# Supplementary material
Source: PubMed Central journal article supplement (PMC7652096)

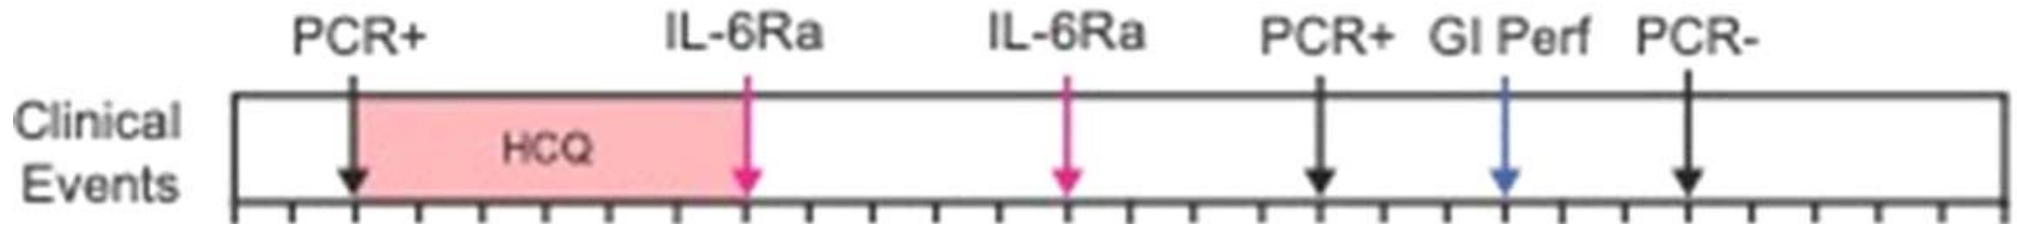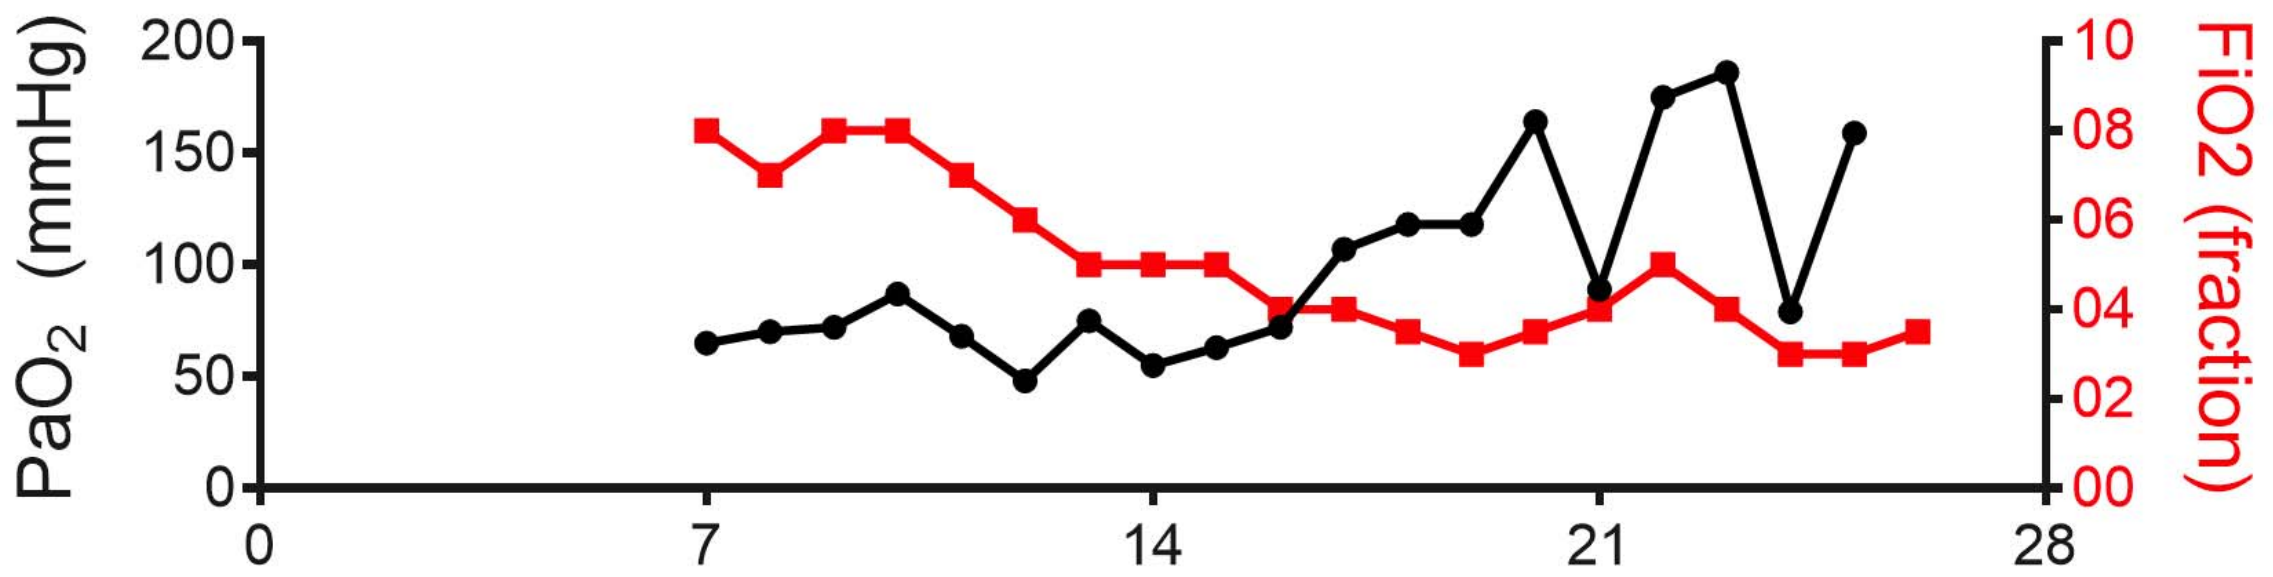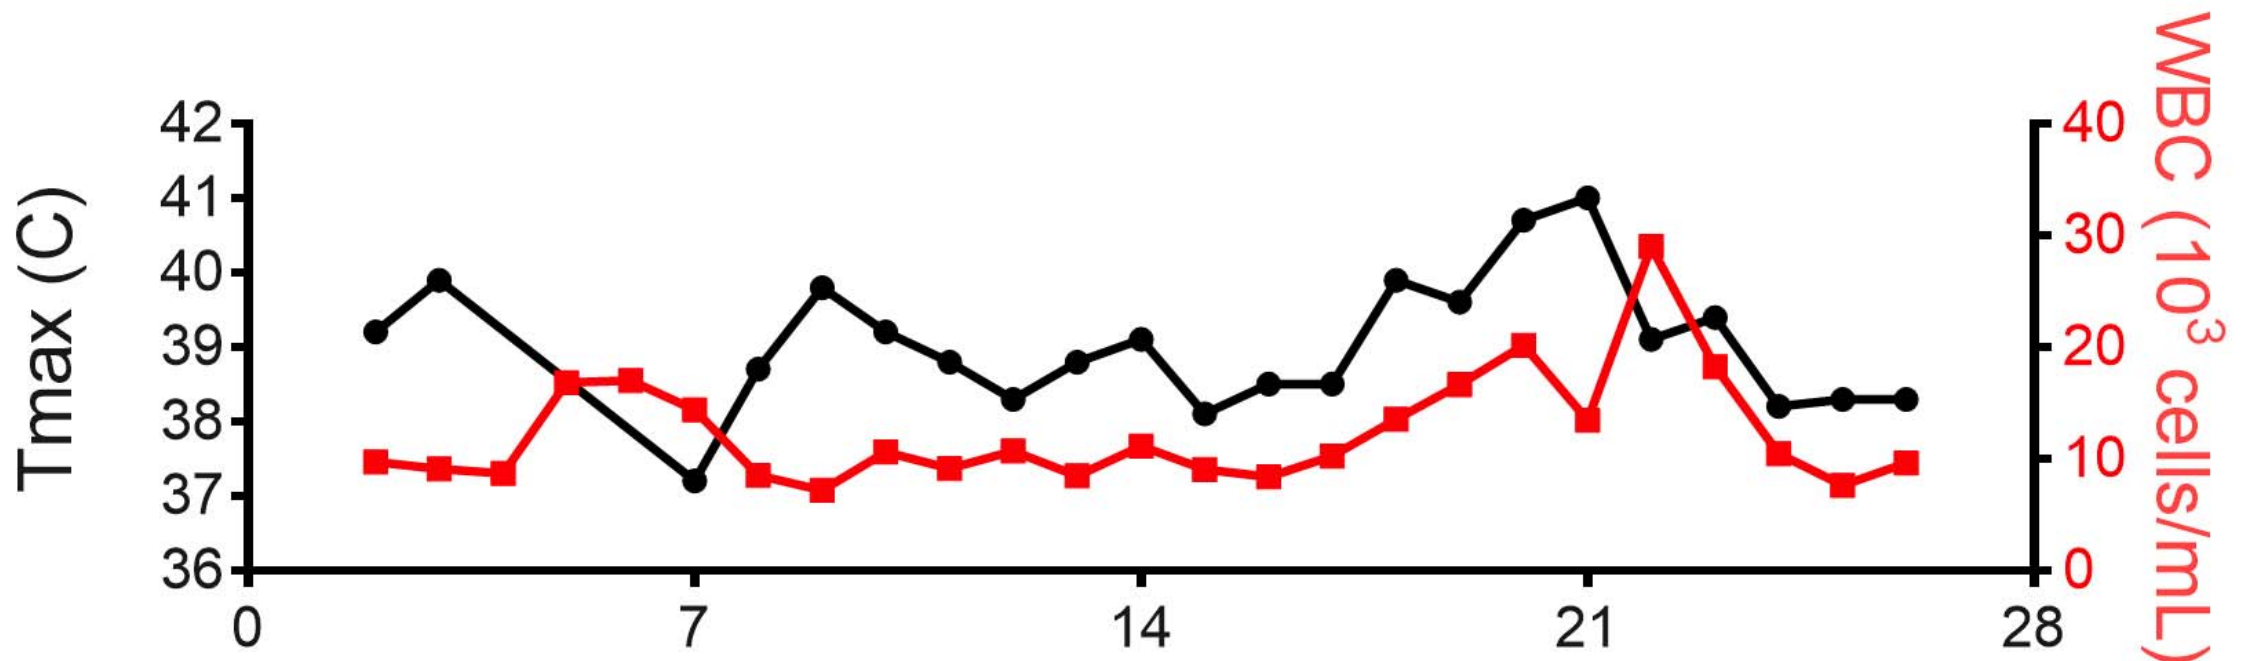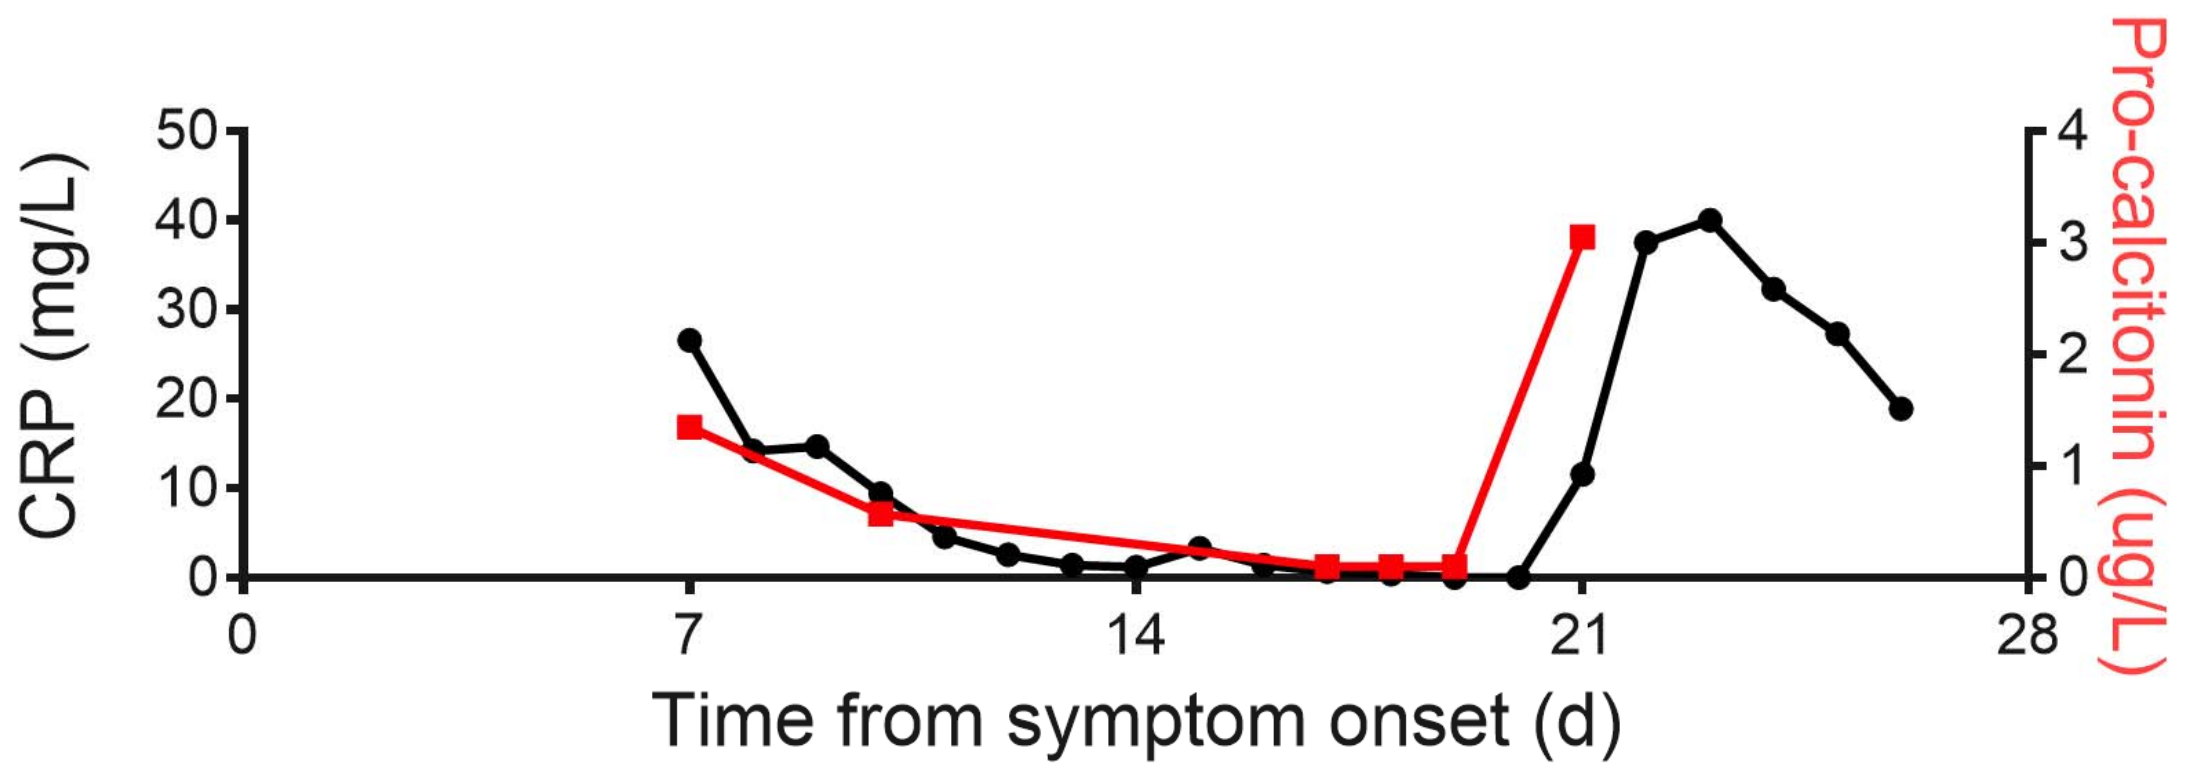

Supplement: ofaa424_suppl_supplementary_figure_1.pdf [file ofaa424_suppl_supplementary_figure_1.pdf]
